# Supplementary material for: Crosstalk between Nutrition, Insulin, Juvenile Hormone, and Ecdysteroid Signaling in the Classical Insect Model, Rhodnius prolixus
Source: MDPI journal article supplement (doi:10.3390/ijms24010007), 2022-12-20
Supplement: s1 [file ijms-2097999-supplementary.pdf › ijms-2097999-supplementary.pdf]

**Supporting Information for**

# **Crosstalk between Nutrition, Insulin, Juvenile Hormone, and Ecdysteroid Signaling in the Classical Insect Model, *Rhodnius prolixus***

**Jimena Leyria <sup>1,\*</sup>, Samiha Benrabaa <sup>1</sup>, Marcela Nouzova <sup>2</sup>, Fernando G. Noriega <sup>3,4</sup>,  
Lilian Valadares Tose <sup>5</sup>, Francisco Fernandez-Lima <sup>5</sup>, Ian Orchard <sup>1</sup> and Angela B. Lange <sup>1</sup>**

<sup>1</sup> Department of Biology, University of Toronto Mississauga,  
Mississauga, ON L5L 1C6, Canada

<sup>2</sup> Biology Center of the Academy of Sciences of the Czech Republic, Institute of  
Parasitology, 37005 České Budějovice, Czech Republic

<sup>3</sup> Department of Biological Sciences and Biomolecular Science Institute, Florida  
International University, Miami, FL 33199, USA

<sup>4</sup> Department of Parasitology, University of South Bohemia,  
37005 České Budějovice, Czech Republic.

<sup>5</sup> Department of Chemistry and Biochemistry and Biomolecular Science Institute,  
Florida International University, Miami, FL 33199, USA

\* Correspondence: jimenal.leyria@utoronto.ca; Tel.: +1-905-569-4752

**This file includes:**

Figure S1

Table S1

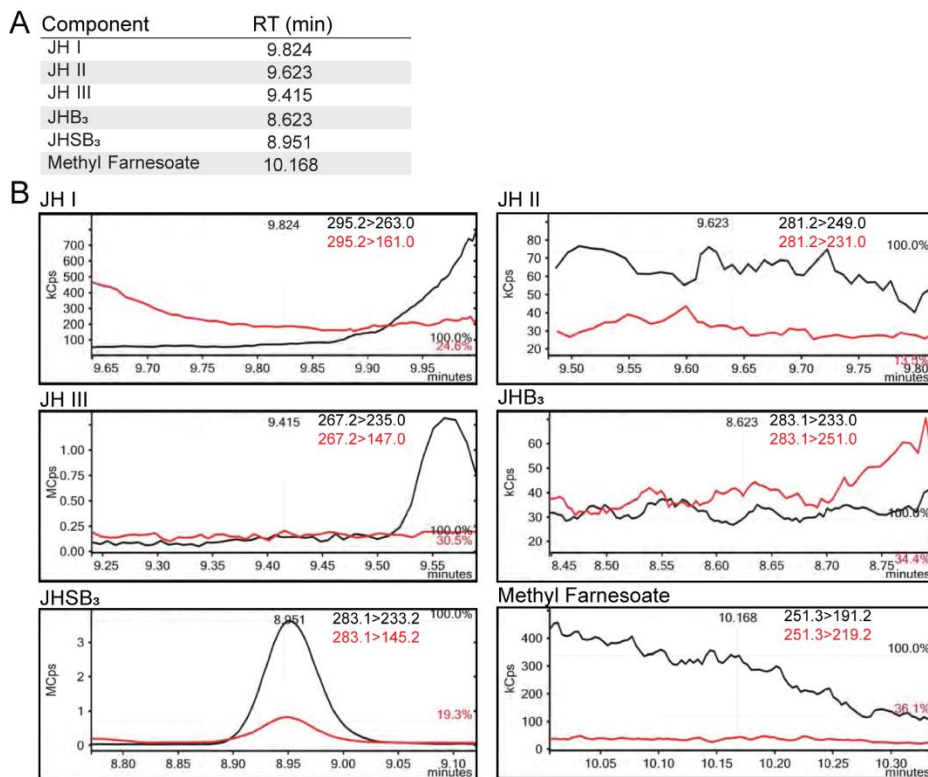

**Supplementary Figure S1. Identification of JHBS<sub>3</sub> from the hemolymph of *R. prolixus* adult females.** (A) Retention times of each component are shown in minutes. (B) Typical LC-MS/MS peaks of JH homologs and MF. It shows the relationships between the retention times in minutes (x-axis) and the signal intensity (cps; counts per second) (y-axis). Black lines represent the signal intensity of the primary transition, and red lines represent the intensity of the secondary transition. Only JHBS<sub>3</sub> shows the presence of the right product ions at the correct retention time.

**Supplementary Table S1.** Primers used for qPCR.

| Gene code                                                  | Primers to qPCR  | Sequence (5→3)            |
|------------------------------------------------------------|------------------|---------------------------|
| RPRC013511                                                 | Vg 1_forward     | TTGCTAGTCGCATGAACCTG      |
|                                                            | Vg 1_reverse     | TTTAGTGGTGCATCGCTCTG      |
| RPRC009875                                                 | Actin_forward    | AGAGAAAAGATGACGCAGATAATGT |
|                                                            | Actin_reverse    | ATATCCCTAACAATTTACGTTTCG  |
| RPRC014419                                                 | Rp49_forward     | GTGAAACTCAGGAGAAATTGGC    |
|                                                            | Rp49_reverse     | AGGACACACCATGCGCTATC      |
| RPRC007496                                                 | Thiol_forward    | CAAAGTTAATGTACACGGTGGTG   |
|                                                            | Thiol_reverse    | CTCCAGACTTCAACGCTGTTA     |
| RPRC007884                                                 | §HMGS_forward    | GCAACTGTTTGAAGAAAGTGGA    |
|                                                            | HMGS_reverse     | AAGCACTGGTACCTCCAAAG      |
| Supercontig RproC3:KQ03422 6<br>minus strand 878233-875494 | §HMGR_forward    | GGCATAGAAAGAAGATGACCAAAC  |
|                                                            | HMGR_reverse     | GCACGAGTATCAAGACAACAATATG |
| RPRC014277                                                 | §MEVK_forward    | GAAAGATCAAGAGGAACGAGGAG   |
|                                                            | MEVK_reverse     | CGCTTATGTGAGACACCTAATGAT  |
| RPRC006212                                                 | §P-MEVK_forward  | AAATCGTTTCTGACGAACAAGTG   |
|                                                            | P-MEVK_reverse   | GCAATGACAACATCCCATTTCAG   |
| RPRC012093                                                 | §PP-MEVK_forward | CGTGGCCTTCCAGTTCAA        |
|                                                            | PP-MEVK_reverse  | GTATTTGAGGAGACCAGGTTTCG   |
| RPRC003718                                                 | §IPPI_forward    | CACCAATTACGCCTTGGTTTAG    |
|                                                            | IPPI_reverse     | GTGGATATTCACGTGGTCTTGA    |
| RPRC010547                                                 | §FOLD_forward    | AAACCGAGCGATGTTGT         |
|                                                            | FOLD_reverse     | GTAGGTTGGATAACTAGTTCTGAT  |
| RPRC002910                                                 | §FALDH_forward   | AGTACCTTACAGTCTAGTATTTGCC |
|                                                            | FALDH_reverse    | GATCTGTCTTCAGCACCGTT      |
| RPRC011659                                                 | §JHAMT_forward   | GGACCAGGCGATGTTACTTT      |
|                                                            | JHAMT_reverse    | CCAAATCATCAGAAATATCGCTTCC |
| RPRC000513                                                 | §Epox_forward    | CGGAGAATTGATTCATGATGATTGG |
|                                                            | Epox_reverse     | GTAACGGCGGTGACAGTAAA      |
| RPRC014226                                                 | §FPPS_forward    | CGCAGTAGTTGCAATGCATAAAG   |
|                                                            | FPPS_reverse     | GCTTCTTGACAGCGGCTATT      |
| RPRC004412                                                 | §FPPP_forward    | GCTTGAATCCTAGAAGAGCGTTA   |
|                                                            | FPPP_reverse     | ACCGGTAAGTACAAGCAATGTAT   |
| RPRC011241                                                 | *Spook_forward   | TGGCATICTCCGATTGGTCT      |
|                                                            | Spook_reverse    | TCATTGAGCAACGTGTCCAGT     |
| RPRC006417                                                 | *Shadow_forward  | GAGGCAAGTTTTCGAAGTGG      |
|                                                            | Shadow_reverse   | TGATTCATAATTCGGCGATG      |
| RPRC011595                                                 | *Dib_forward     | TTGCACACTACCGTTTGTTCG     |
|                                                            | Dib_reverse      | AATGCGAGCAAGTGGTTTTT      |
| RPRC009372                                                 | *Phantom_forward | TGCCATACACGGAAGCATGT      |
|                                                            | Phantom_reverse  | CGATAGCCTGCCAGTTCAGT      |

|                |                   |                        |
|----------------|-------------------|------------------------|
| RPRC006945     | *Shade_forward    | ATTCTTTGGGCTCCCATTCT   |
|                | Shade_reverse     | GCCATGAACACACTTTGCAC   |
| RPRC001631     | *Nvd_forward      | TGCTCCACTCATCTTGAAAGC  |
|                | Nvd_reverse       | ACTTGGCAATGGTTTTGTCTGT |
| RPRC006251     | Rhopr-IR1_forward | TGGTTCGGTGGGAGACAGCT   |
|                | Rhopr-IR1_reverse | AGAAGTCGAGCGACACCAGT   |
| GECK01011918.1 | Rhopr-IR2_forward | CTTGCTGGGGTTGGAGAATA   |
|                | Rhopr-IR2_reverse | TCAGACTGACGACGGAAGTG   |
| KF740716       | AT-R_forward      | TGCCGAACGTCATTACACCA   |
|                | AT-R_reverse      | ATGGCCAGGTATGTTGTCCG   |
| RPRC004708     | ASTA-R_forward    | TTGTCGTAGCGGTCAACCAA   |
|                | ASTA-R_reverse    | AGGTGTCACCAAAAGGCCAA   |

<sup>§</sup>Primers reported by Villalobos-Sambucaro et al. [50]; \*Primers reported by Benrabaa et al. [52]
